# Supplementary material
Source: PubMed Central journal article supplement (PMC6676190)

Figure S1. ROC Activity curve of 13 hub genes. ROC, receiver operating characteristic; TLR2, Toll-like receptor 2; MAPK13, mitogen-activated protein kinase 13; GSTO1, glutathione S-transferase omega 1; GSTO2, glutathione S-transferase o 2; BCL2L1, BCL2 like 1; RALA, RAS like proto-oncogene A; TGFA, transforming growth factor  $\alpha$ ; CDK4, cyclin dependent kinase 4; PLD1, phospholipase D1; IRAK1, interleukin 1 receptor associated kinase 1; CCL2, C-C motif chemokine ligand 2; GNA15, G protein subunit  $\alpha$  15; GNAI3, G protein subunit  $\alpha$  I3.

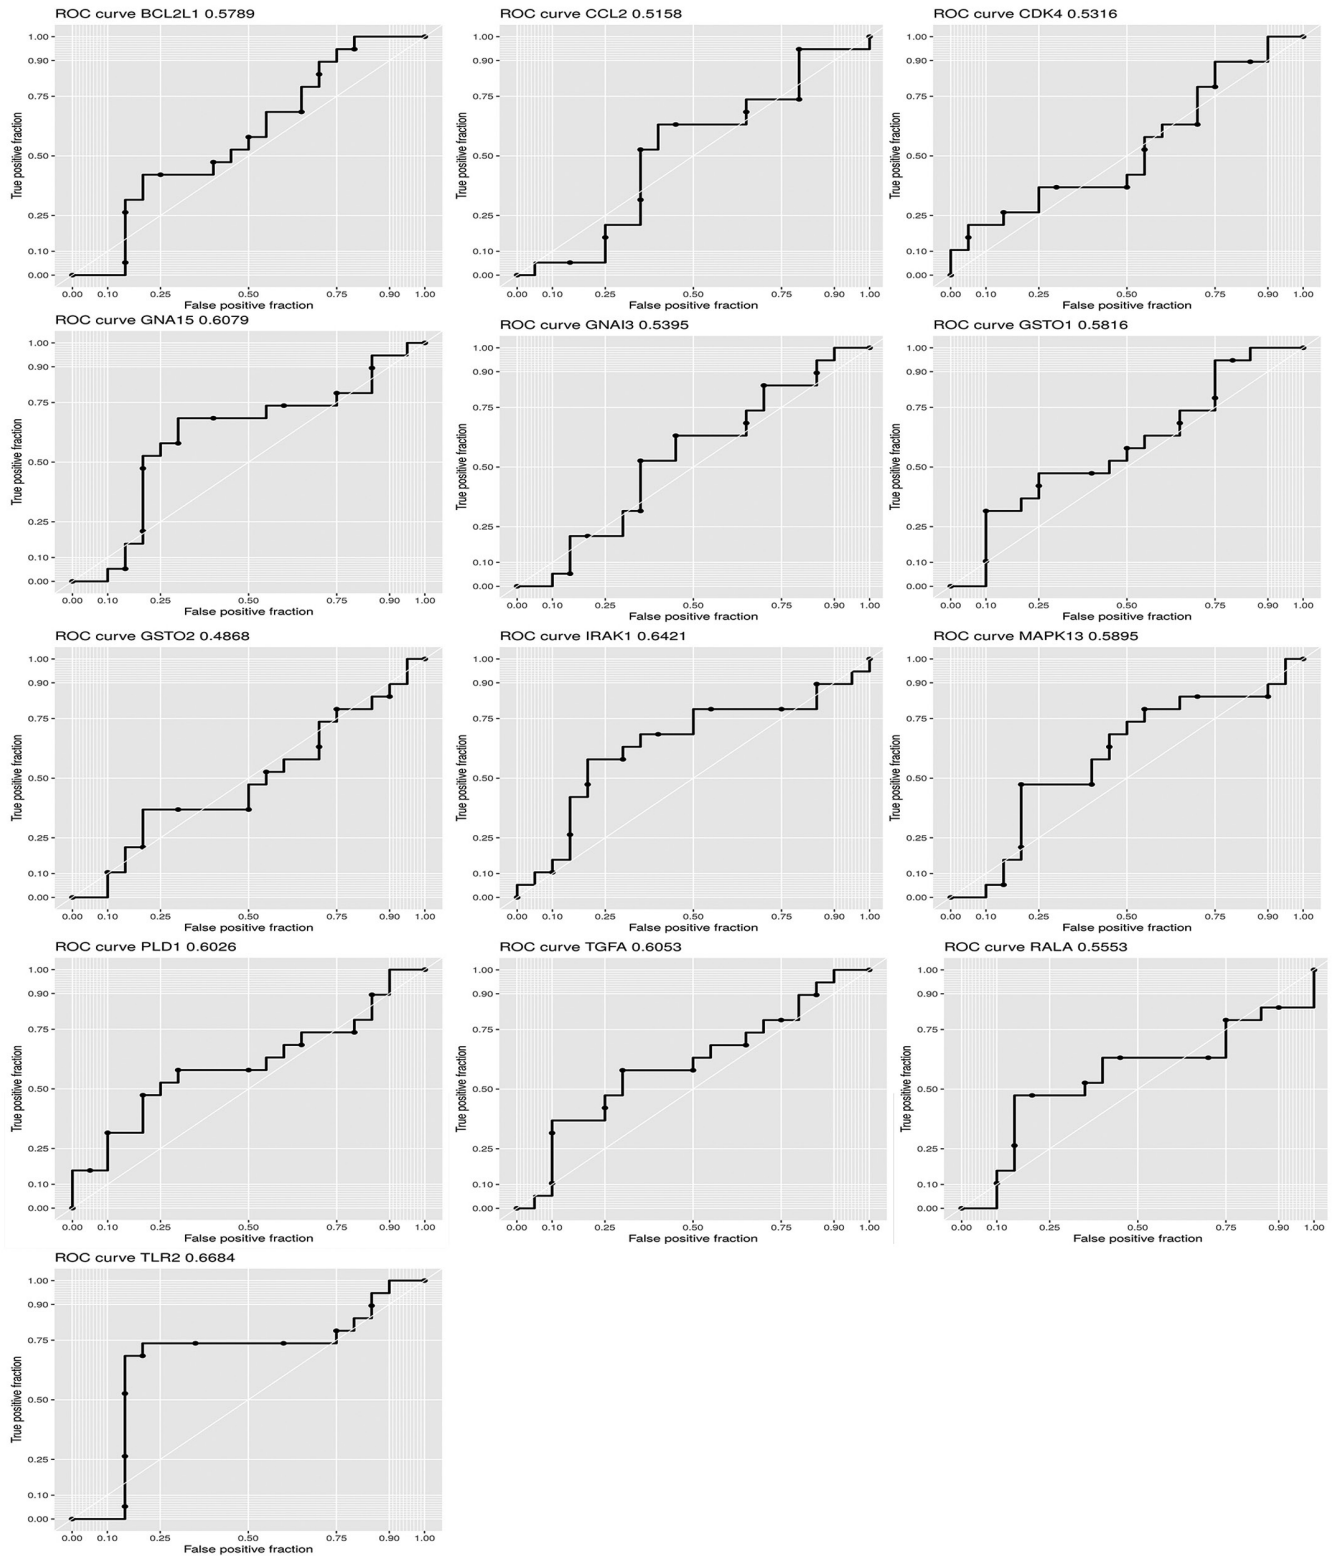

CHAGAS DISEASE

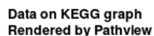

Supplement: Supplementary_Data.pdf [file Supplementary_Data.pdf]
